# Supplementary material
Source: publisher figshare collection journal article supplement (https://acs.figshare.com/ndownloader/files/4568113)
Supplement: Supplementary file 1 [file 4568113]

## Supporting information

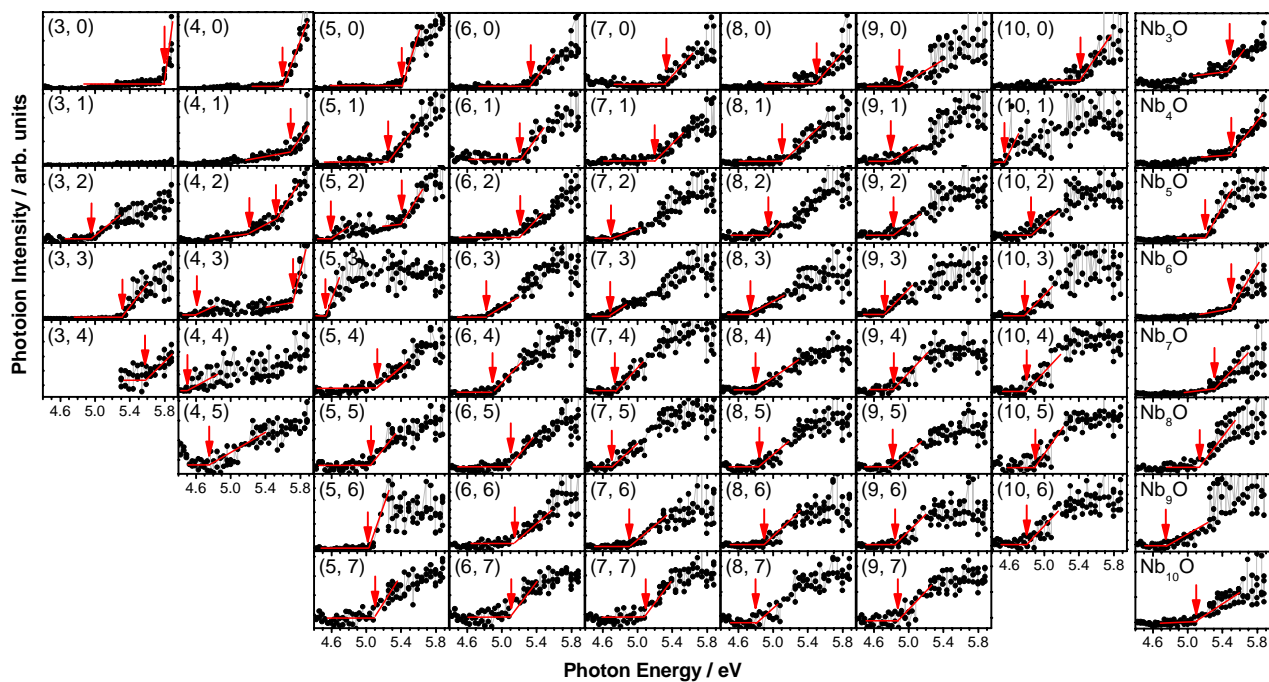

**Figure S1.** Photoionization efficiency spectra for  $\text{Nb}_n\text{C}_m$  and  $\text{Nb}_n\text{O}$  ( $n = 3-10$ ;  $m = 0-7$ ) clusters. Arrows indicate the lowest and second lowest ionization thresholds.

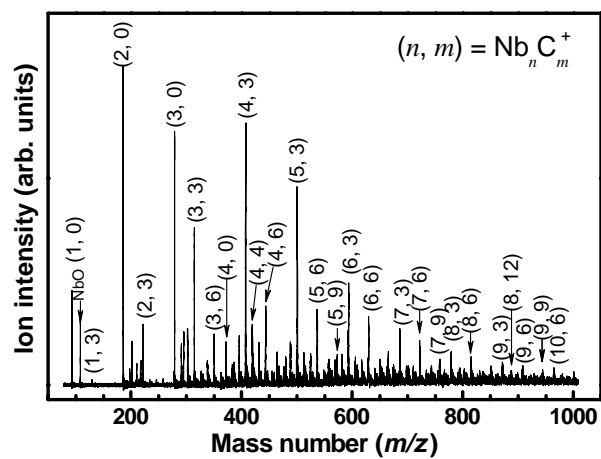

**Figure S2.** Mass spectrum of native  $\text{Nb}_n\text{C}_m^+$  cluster ions produced in the double laser ablation source.

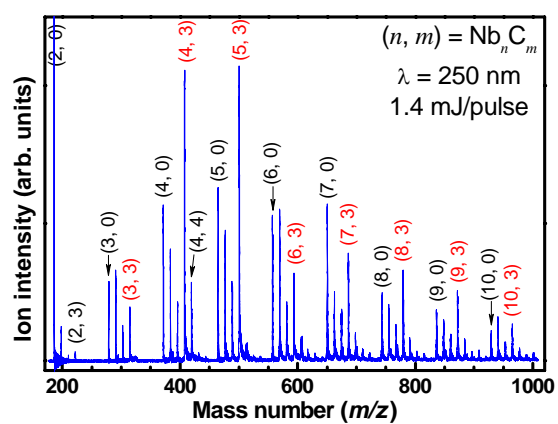

**Figure S3.** Mass spectrum of  $\text{Nb}_n\text{C}_m$  clusters photoionized at the wavelength of 250 nm with the pulse energy of 1.4 mJ. Abundantly formed  $\text{Nb}_n\text{C}_3^+$  clusters are labeled in red.
